# Supplementary material for: Direct methylation of N-methylaniline with CO2/H2 catalyzed by gold nanoparticles supported on alumina
Source: Royal Society of Chemistry journal article supplement (doi:10.1039/c5ra20991a), 2015-01-01
Supplement: c5ra20991a1.pdf [file c5ra20991a1.pdf]

## Direct methylation of N-Methylaniline with CO<sub>2</sub>/H<sub>2</sub> catalyzed by gold nanoparticles supported on alumina

Gao Tang,<sup>a</sup> Hong-Liang Bao,<sup>b</sup> Chan Jin,<sup>b</sup> Xin-Hua Zhong<sup>\*a</sup> and Xian-Long Du<sup>\*b</sup>

<sup>a</sup> Key Laboratory for Advanced Materials, Institute of Applied Chemistry, East China University of Science and Technology, Shanghai 200237 (P. R. China)

<sup>b</sup> Key Laboratory of Interfacial Physics and Technology, Shanghai Institute of Applied Physics, Chinese Academy of Sciences, Jialuo Road 2019, Shanghai 201800 (P. R. China)

### 1. In situ XRD patterns of the Al<sub>2</sub>O<sub>3</sub> obtained by different calcination temperatures

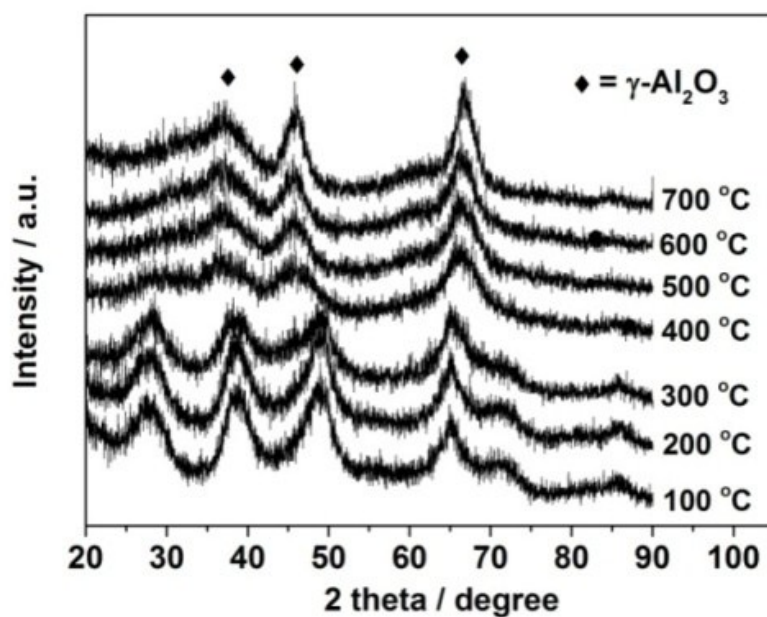

**Fig. S1** In situ XRD patterns of the Al<sub>2</sub>O<sub>3</sub> obtained by different calcination temperatures.

2. TEM micrographs and corresponding Au particle size distributions for Au catalysts loaded on various supports

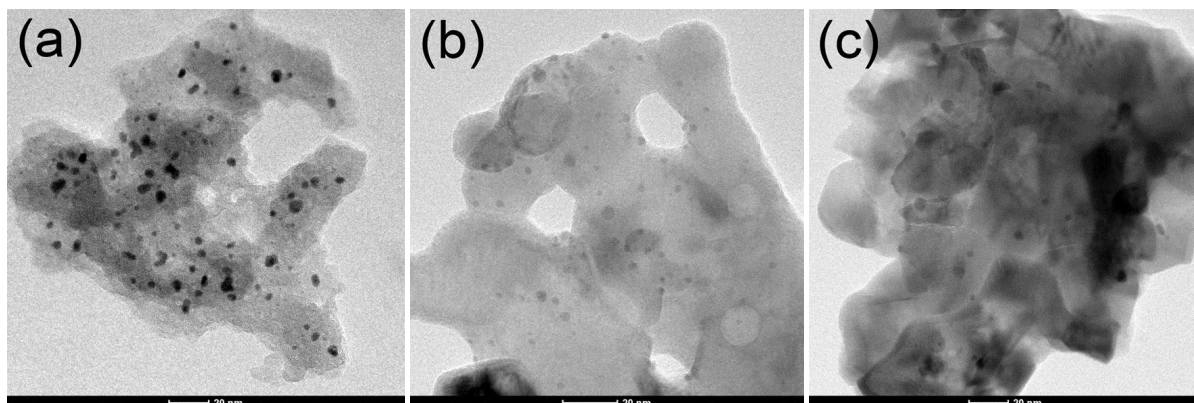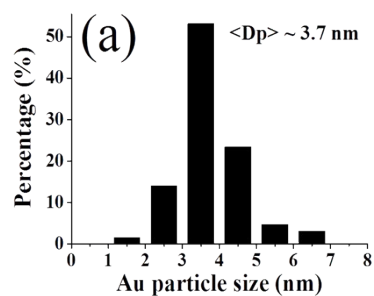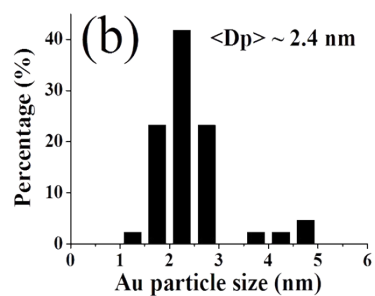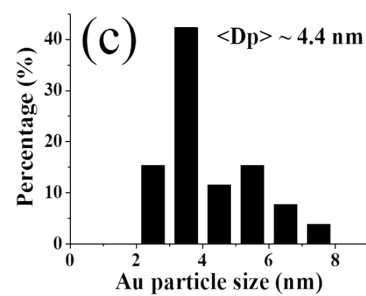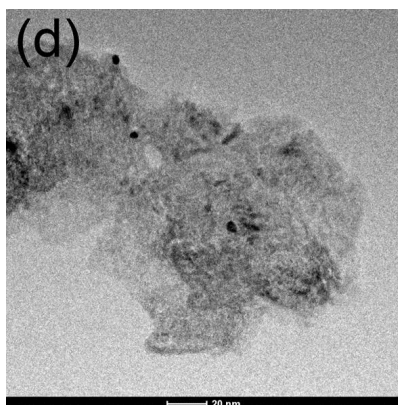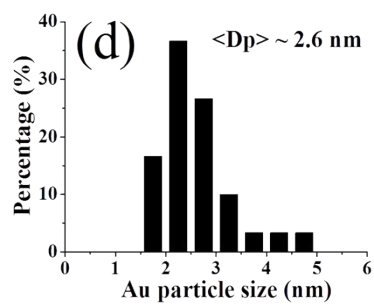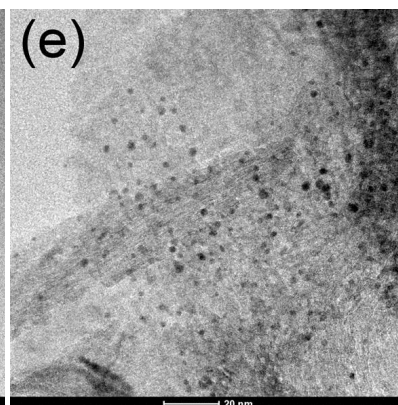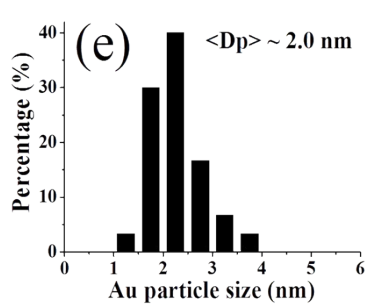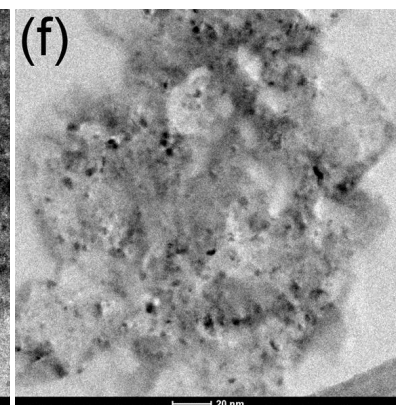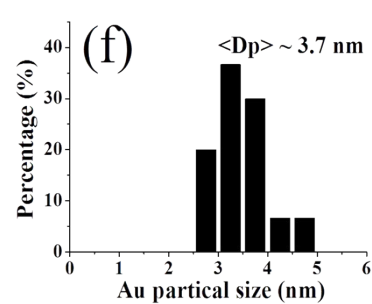

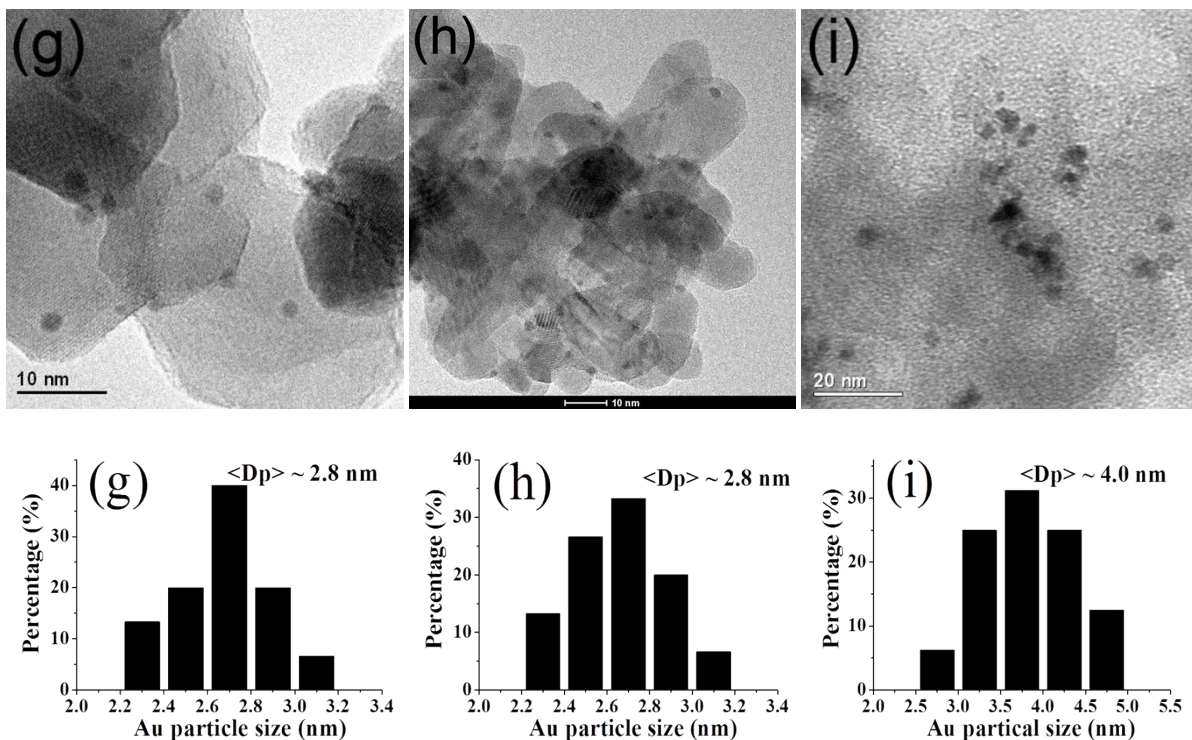

**Fig. S2** TEM micrographs and corresponding Au particle size distributions for Au catalysts loaded on various supports: (a) Au/SiO<sub>2</sub>, (b) Au/Mn<sub>2</sub>O<sub>3</sub>, (c) Au/Co<sub>3</sub>O<sub>4</sub>, (d) Au/MgO, (e) Au/Al<sub>2</sub>O<sub>3</sub>, (f) Au/CeO<sub>2</sub>, (g) Au/TiO<sub>2</sub>, (h) Au/ZnO, and (i) Au/C.

### 3. Effects of pressure on catalytic performances of Au/Al<sub>2</sub>O<sub>3</sub> catalyst for direct methylation of N-methylaniline with CO<sub>2</sub>/H<sub>2</sub>

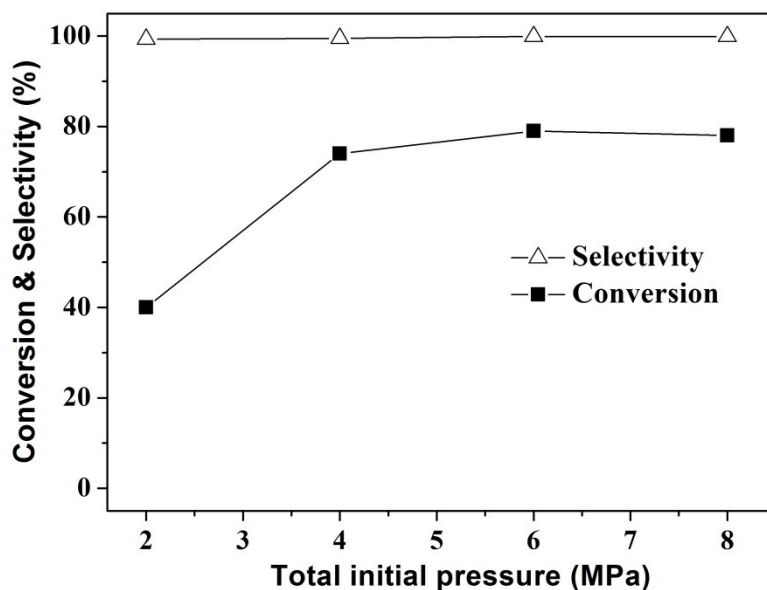

**Fig. S3** Effects of pressure on catalytic performances of Au/Al<sub>2</sub>O<sub>3</sub> catalyst for direct methylation of N-methylaniline with CO<sub>2</sub>/H<sub>2</sub>. Reaction condition: 0.5 mol% Au, 1.0 mmol N-methylaniline, cyclohexane 10 mL, CO<sub>2</sub> (1 MPa), H<sub>2</sub> (3 MPa), T = 140 °C, t = 5 h.

**4. Effects of temperature on the catalytic performances of Au/Al<sub>2</sub>O<sub>3</sub> catalyst for direct methylation of N-methylaniline with CO<sub>2</sub>/H<sub>2</sub>**

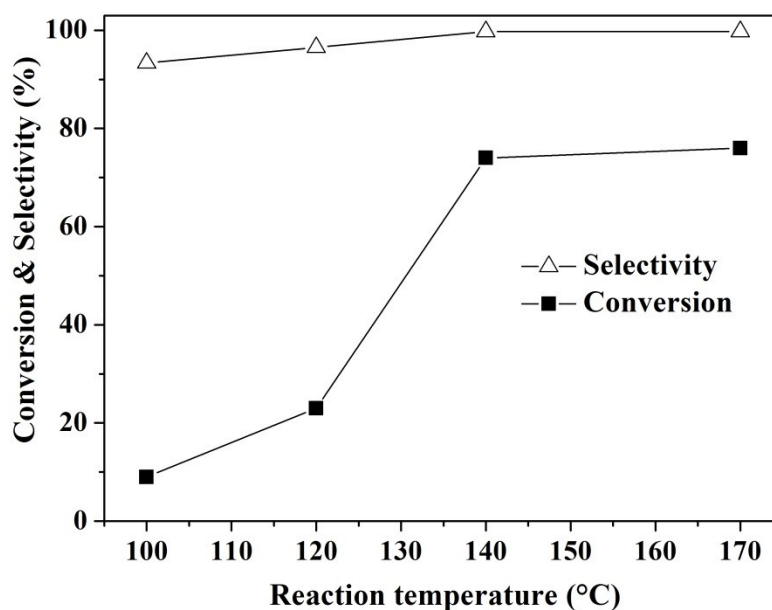

**Fig. S4** Effects of temperature on the catalytic performances of Au/Al<sub>2</sub>O<sub>3</sub> catalyst for direct methylation of N-methylaniline with CO<sub>2</sub>/H<sub>2</sub>. Reaction condition: 0.5 mol% Au, 1.0 mmol N-methylaniline, cyclohexane 10mL, CO<sub>2</sub> (1 MPa), H<sub>2</sub> (3 MPa), T = 140 °C, t = 5 h.

**5. Time courses for the conversions of N-methylaniline with CO<sub>2</sub>/H<sub>2</sub> during the initial stage using Au/Al<sub>2</sub>O<sub>3</sub> catalysts with different Au NP sizes from 1.8 to 8.3 nm and Al<sub>2</sub>O<sub>3</sub>**

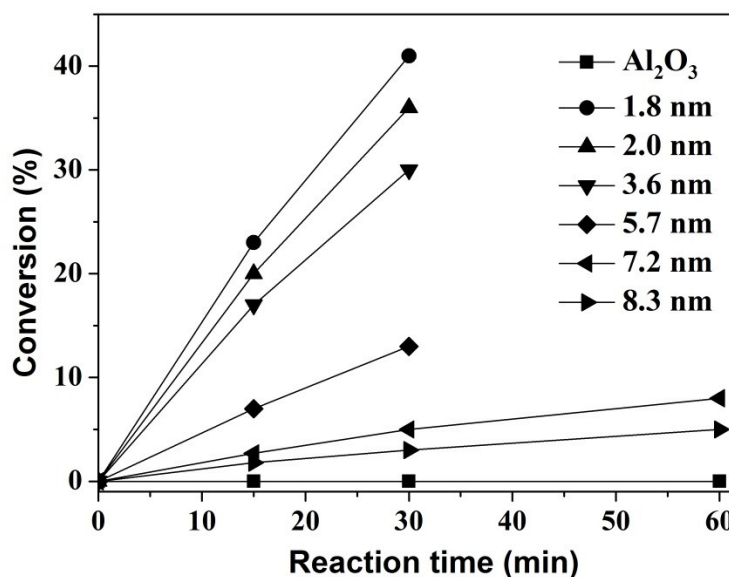

**Fig. S5** Time courses for the conversions of N-methylaniline with CO<sub>2</sub>/H<sub>2</sub> during the initial stage using Au/Al<sub>2</sub>O<sub>3</sub> catalysts with different Au NPs sizes from 1.8 to 8.3 nm and Al<sub>2</sub>O<sub>3</sub>. Reaction conditions: catalyst 0.14 g (Au 2.7-5 μmol), 1.0 mmol N-methylaniline, cyclohexane 10 mL, CO<sub>2</sub> (1 MPa), H<sub>2</sub> (3 MPa), T = 140 °C.



**Table S1** Initial reaction rates of the Au/Al<sub>2</sub>O<sub>3</sub> catalysts with various mean Au NPs sizes and Al<sub>2</sub>O<sub>3</sub> for direct methylation of N-methylaniline with CO<sub>2</sub>/H<sub>2</sub><sup>a</sup>

| Catalyst                          | Au loading (wt %) | Mean size (nm) | Initial reaction rate <sup>b</sup> (mmol h <sup>-1</sup> g <sup>-1</sup> (cat.)) |
|-----------------------------------|-------------------|----------------|----------------------------------------------------------------------------------|
| Al <sub>2</sub> O <sub>3</sub>    | 0                 | -              | 0                                                                                |
| Au/Al <sub>2</sub> O <sub>3</sub> | 0.40              | 1.8            | 5.86                                                                             |
| Au/Al <sub>2</sub> O <sub>3</sub> | 0.73              | 2.0            | 5.14                                                                             |
| Au/Al <sub>2</sub> O <sub>3</sub> | 0.70              | 3.6            | 4.00                                                                             |
| Au/Al <sub>2</sub> O <sub>3</sub> | 0.70              | 5.7            | 1.86                                                                             |
| Au/Al <sub>2</sub> O <sub>3</sub> | 0.46              | 7.2            | 0.61                                                                             |
| Au/Al <sub>2</sub> O <sub>3</sub> | 0.47              | 8.3            | 0.36                                                                             |

<sup>a</sup> Reaction conditions: catalyst 0.14 g (Au 3-5 μmol), 1.0 mmol N-methylaniline, cyclohexane 10mL, CO<sub>2</sub> (1 MPa), H<sub>2</sub> (3 MPa), T = 140 °C. <sup>b</sup> Measured from Figure S5.

### 6. TEM micrographs and corresponding Au particle size distributions for the Au/Al<sub>2</sub>O<sub>3</sub> catalysts reduced at different temperatures

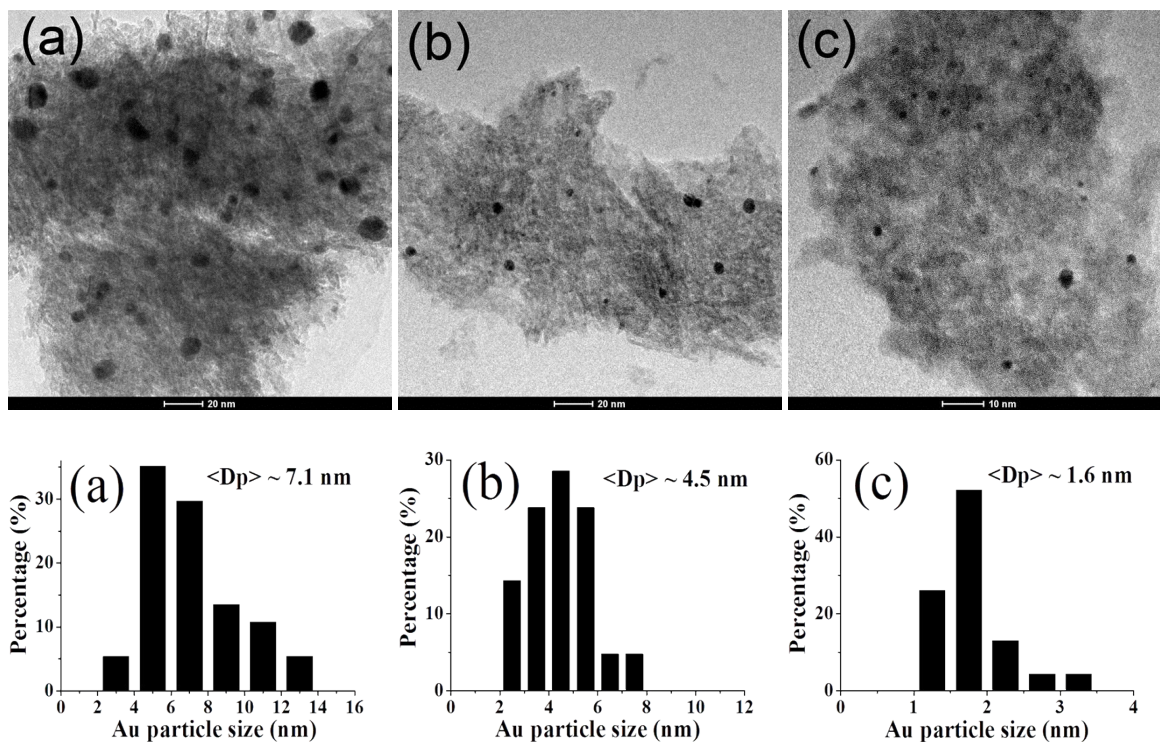

**Fig. S6** TEM micrographs and corresponding Au particle size distributions for the Au/Al<sub>2</sub>O<sub>3</sub> catalysts reduced at different temperatures: (a) 150, (b) 250 and (c) 450 °C.

7. Influence of mean Au NPs size on conversion and selectivity of direct methylation of N-methylaniline with CO<sub>2</sub>/H<sub>2</sub>.

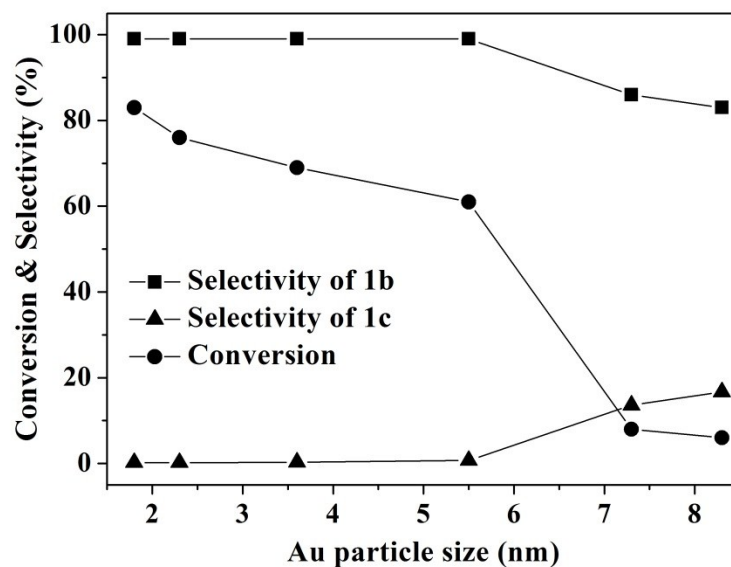

**Fig. S7** Influence of mean Au particle size on conversion and selectivity of direct methylation of N-methylaniline with CO<sub>2</sub>/H<sub>2</sub>. Reaction condition: 1.0 mmol N-methylaniline, 3-5  $\mu$ mol Au, cyclohexane 10 mL, CO<sub>2</sub> (1 MPa), H<sub>2</sub> (3 MPa), T = 140  $^{\circ}$ C, t = 5 h. Note: N-methylformanilide (**1c**), N, N-dimethylaniline (**1b**).
